# Supplementary material
Source: publisher figshare collection journal article supplement (https://acs.figshare.com/ndownloader/files/28175448)
Supplement: Supplementary file 1 [file 28175448]

## **Supporting Information**

### **A General Strategy to Fabricate Porous Co-Based Bimetallic Metal Oxides Nanosheets for High Performance CO Sensing**

*Cong Qin<sup>1</sup>, Bing Wang<sup>1,\*</sup>, Nan Wu<sup>2</sup>, Cheng Han<sup>1</sup>, Yingde Wang<sup>1,\*</sup>*

<sup>1</sup>Science and Technology on Advanced Ceramic Fibers and Composites Laboratory, College of Aerospace Science and Engineering, National University of Defense Technology, Changsha 410073, PR China

<sup>2</sup>Department of Material Science and Engineering, College of Aerospace Science and Engineering, National University of Defense Technology, Changsha 410073, PR China

\*Corresponding authors:

E-Mail: bingwang@nudt.edu.cn

E-Mail: wangyingde@nudt.edu.cn

## Contents

|                                                                                                                                                              |      |
|--------------------------------------------------------------------------------------------------------------------------------------------------------------|------|
| 1. Photograph of the gas testing setup and Au electrodes (Figure S1)                                                                                         | S-6  |
| 2. TG-DSC curves of Co-MOF NS (Figure S2)                                                                                                                    | S-7  |
| 3. XPS survey spectra of Co-M-O NS (Figure S3)                                                                                                               | S-8  |
| 4. Co 2p <sub>3/2</sub> spectrum of Co-M-O NS (Figure S4)                                                                                                    | S-9  |
| 5. Optical photographs of CoM-MOF NS (Figure S5)                                                                                                             | S-10 |
| 6. ICP-AES analysis results of Co-M-O nanosheets (Table S1)                                                                                                  | S-11 |
| 7. SEM images of the ZIF-CoCu, CoCu-MOF NS, and Co-Cu-O NS with different Co/Cu ratios (Figure S6)                                                           | S-12 |
| 8. SEM images of the ZIF-CoMn, CoMn-MOF NS, and Co-Mn-O NS with different Co/Mn ratios (Figure S7)                                                           | S-13 |
| 9. SEM images of the ZIF-CoNi, CoNi-MOF NS, and Co-Ni-O NS with different Co/Ni ratios (Figure S8)                                                           | S-14 |
| 10. SEM images of the ZIF-CoZn, CoZn-MOF NS, and Co-Zn-O NS with different Co/Zn ratios (Figure S9)                                                          | S-15 |
| 11. TEM images of the Co-Cu-O NS sample (Figure S10)                                                                                                         | S-16 |
| 12. TEM images of the Co-Mn-O NS sample (Figure S11)                                                                                                         | S-17 |
| 13. TEM images of the Co-Ni-O NS sample (Figure S12)                                                                                                         | S-18 |
| 14. TEM images of the Co-Zn-O NS sample (Figure S13)                                                                                                         | S-19 |
| 15. SAED patterns of Co-M-O NS samples (Figure S14)                                                                                                          | S-20 |
| 16. Temperature-dependent sensing response of Co-M-O NS toward 100 ppm of CO (Figure S15)                                                                    | S-21 |
| 17. Dynamic sensing response of Co-Cu-O NS toward CO at 125 °C (Figure S16)                                                                                  | S-22 |
| 18. Dynamic sensing response of Co-Mn-O NS toward CO at 175 °C (Figure S17)                                                                                  | S-23 |
| 19. Dynamic sensing response of Co-Ni-O NS toward CO at 125 °C (Figure S18)                                                                                  | S-24 |
| 20. Dynamic sensing response of Co-Zn-O NS toward CO at 175 °C (Figure S19)                                                                                  | S-25 |
| 21. Dynamic gas-sensing transients of the Co-M-O NS toward 40 ppm of CO under different humid conditions (Figure S20)                                        | S-26 |
| 22. Long-term stability of the sensors toward 40 ppm CO (Figure S21)                                                                                         | S-27 |
| 23. TEM images of the Co-M-O materials after sensing tests. (Figure S22)                                                                                     | S-28 |
| 24. Response curves of the Co-M-O NS toward 200-2000 ppm CO (Figure S23)                                                                                     | S-29 |
| 25. Comparison of carbon monoxide sensing performances of Co <sub>3</sub> O <sub>4</sub> -based materials reported in literature and in this work (Table S2) | S-30 |
| 26. Results of curve fitting of Co 2p and O 1s XPS spectra of the Co-M-O samples (Table S3)                                                                  | S-31 |
| 27. References                                                                                                                                               | S-32 |

**Note S1** Reagents.

Cobalt nitrate hexahydrate ( $\text{Co}(\text{NO}_3)_2 \cdot 6\text{H}_2\text{O}$ , 99.0%), zinc nitrate hexahydrate ( $\text{Zn}(\text{NO}_3)_2 \cdot 6\text{H}_2\text{O}$ , 99.0%), copper nitrate trihydrate ( $\text{Cu}(\text{NO}_3)_2 \cdot 3\text{H}_2\text{O}$ , 99.0%), manganese nitrate hexahydrate ( $\text{Mn}(\text{NO}_3)_2 \cdot 6\text{H}_2\text{O}$ ), nickel nitrate hexahydrate ( $\text{Ni}(\text{NO}_3)_2 \cdot 6\text{H}_2\text{O}$ , 98.0%), anhydrous methanol (99.5%) and 2-methylimidazole (2-mIM, 99.0%) were purchased from Aladdin Industrial, Inc. (Shanghai, China). All chemicals were used without further purification.

**Note S2 Characterization.**

X-ray diffraction (XRD) pattern was obtained using a PANalytical Empyrean with a Cu K $\alpha$  radiation (0.15406 nm). The morphology and microstructure of the products were observed by field emission scanning electron microscopy (FE-SEM, Hitachi S-4800, Chiyoda, Tokyo, Japan) and transmission electron microscope (TEM, Tecnai G2 F20 S-TWIN). The thermogravimetric analysis (TGA) of the product was measured using a TG209F1 (NETZSCH, Germany). Nitrogen (N<sub>2</sub>) adsorption-desorption tests were achieved using a 3H-2000PM2 analyzer. Before measurements, the products were subjected to degassing in vacuum at 200 °C for 6 h. The chemical binding states of the samples were conducted by X-ray photoelectron spectroscopy (XPS, Thermo Scientific ESCALAB 250Xi).

**Note S3** Sensor fabrication and measurement.

Firstly, 2 mg of the as-prepared sample was dispersed in 200  $\mu\text{L}$  of deionized water and sonicated for 0.5 h to form a homogeneous suspension. Then, a resistive sensor was formed by dropping 20  $\mu\text{L}$  of suspension onto an alumina ceramic substrate (10 mm in length, 5 mm and 0.25 mm in width and height, respectively) with Au interdigitated electrodes. The sensor was naturally dried in air and heated at 100  $^{\circ}\text{C}$  for 2h to ensure a close contact between Au electrodes and sensing materials. The gas-sensing measurement was performed on a CGS-1TPS instrument (Beijing Elite Tech Co., Ltd. Beijing, China). The relative humidity was fixed at 40% RH. For a p-type semiconductor, the response (S) is defined as  $(R_g - R_a)/R_a \cdot 100\%$ , where  $R_a$  and  $R_g$  represent the resistances of the sensors in ambient air and CO, respectively. The response/recovery time are defined as the time required for the sensor to reach 90% of the total resistance change in ambient air or CO.

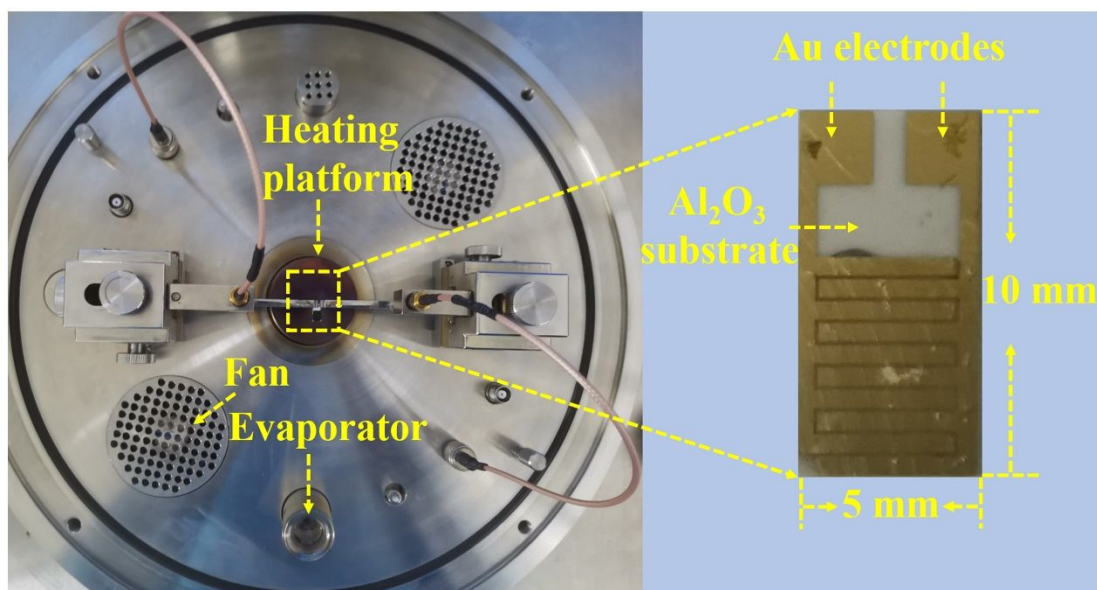

**Figure S1.** Photograph of the gas sensing measurement system and Au electrodes.

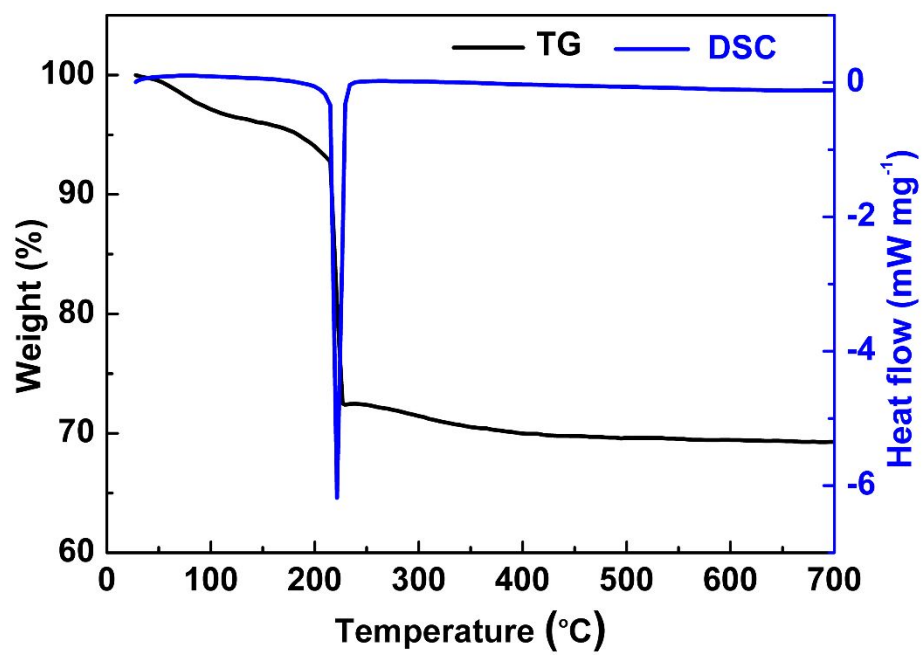

**Figure S2.** TG-DSC curves of Co-MOF NS.

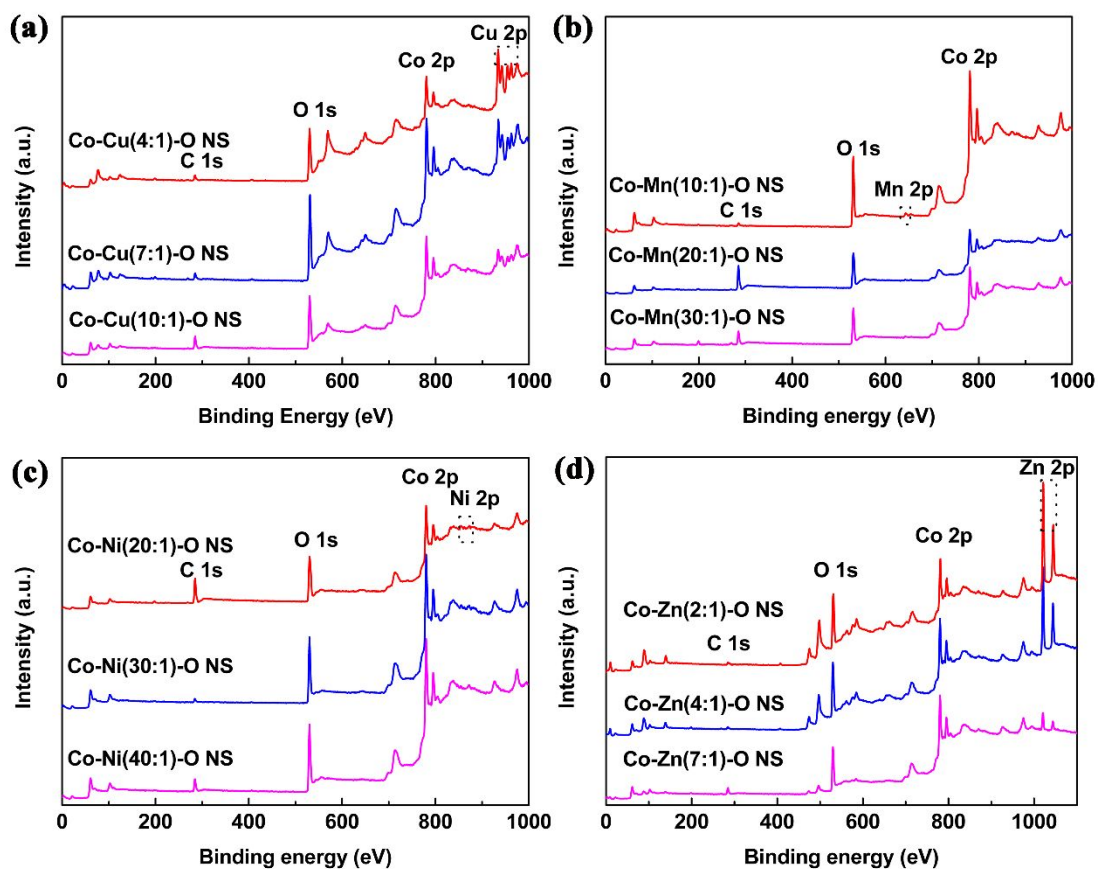

**Figure S3.** XPS survey spectra of (a) Co-Cu-O NS, (b) Co-Mn-O NS, (c) Co-Ni-O NS, and (d) Co-Zn-O NS.



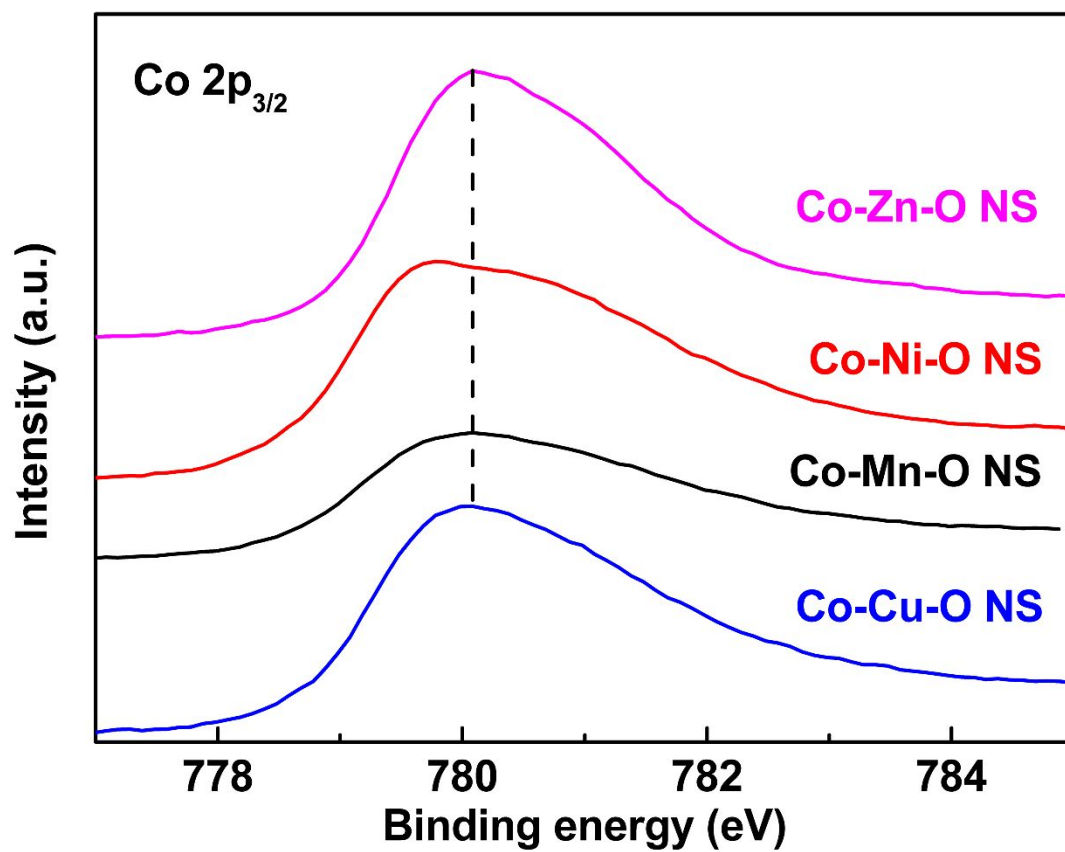

**Figure S4.** Co 2p<sub>3/2</sub> spectrum of Co-Cu(7:1)-O NS, Co-Mn(20:1)-O NS, Co-Ni(30:1)-O NS and Co-Zn(4:1)-O NS.

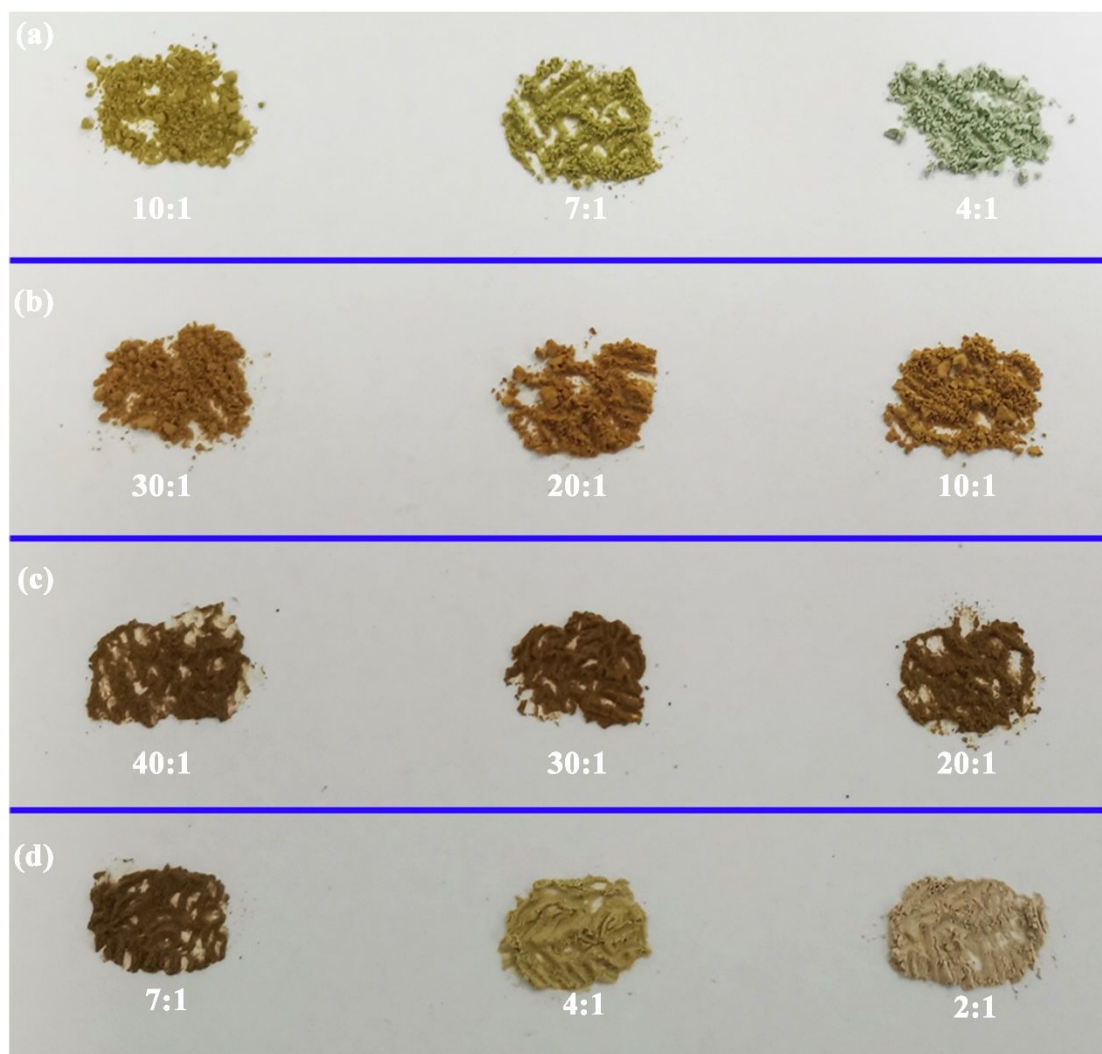

**Increase of M content in CoM-MOF NS**

**Figure S5.** Optical photographs of (a) CoCu-MOF NS, (b) CoMn-MOF NS, (c) CoNi-MOF NS, and (d) CoZn-MOF NS with different Co/M ratios in the initial precursors.

Note: In fact, we synthesized a series of samples with different Co/M (M = Cu, Mn, Ni, Zn) ratios for every group. For the sake of discussion, we only picked out three samples from each group according to the sensing-performances for the further statement.

**Table S1.** ICP-AES analysis results of Co-M-O nanosheets.

| Sample        | Element | Content (wt.%) |
|---------------|---------|----------------|
| Co-Cu(10:1)-O | Cu      | 1.16%          |
| Co-Cu(7:1)-O  | Cu      | 2.17%          |
| Co-Cu(4:1)-O  | Cu      | 4.20%          |
| Co-Mn(30:1)-O | Mn      | 0.08%          |
| Co-Mn(20:1)-O | Mn      | 0.14%          |
| Co-Mn(10:1)-O | Mn      | 0.26%          |
| Co-Ni(40:1)-O | Ni      | 0.20%          |
| Co-Ni(30:1)-O | Ni      | 0.26%          |
| Co-Ni(20:1)-O | Ni      | 0.37%          |
| Co-Zn(7:1)-O  | Zn      | 2.28%          |
| Co-Zn(4:1)-O  | Zn      | 11.88%         |
| Co-Zn(2:1)-O  | Zn      | 22.62%         |

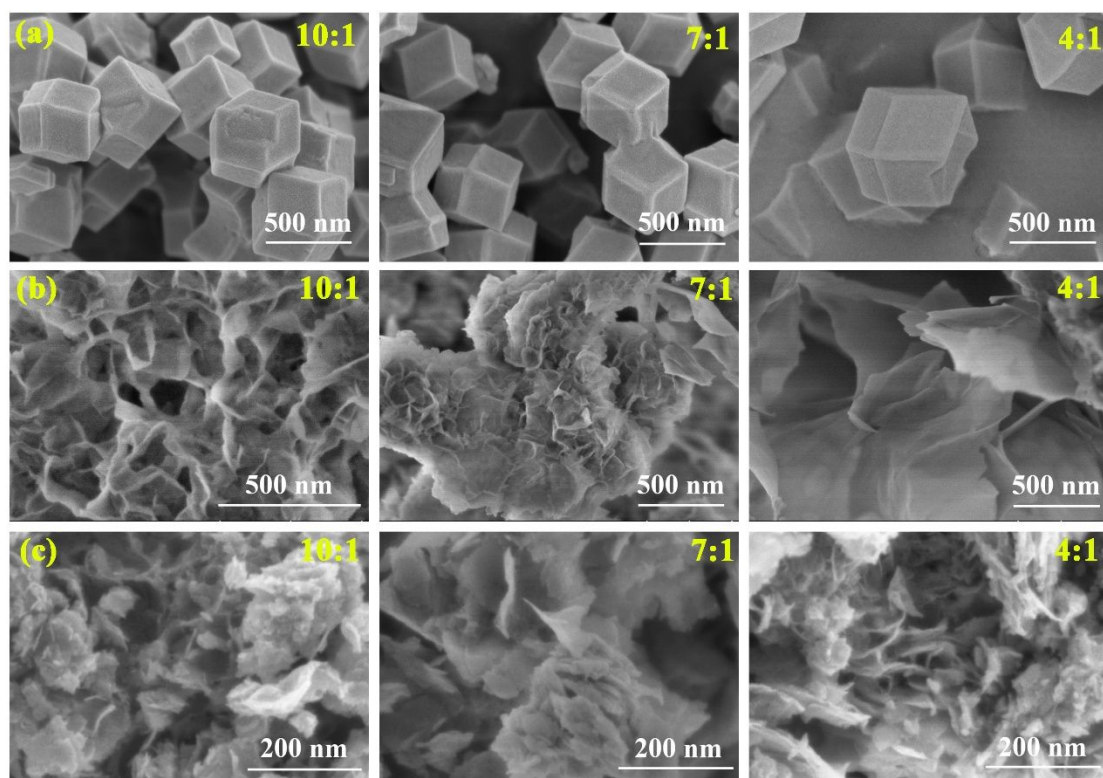

**Figure S6.** SEM images of the (a) ZIF-CoCu, (b) CoCu-MOF NS, and (c) Co-Cu-O NS with different Co/Cu ratios.

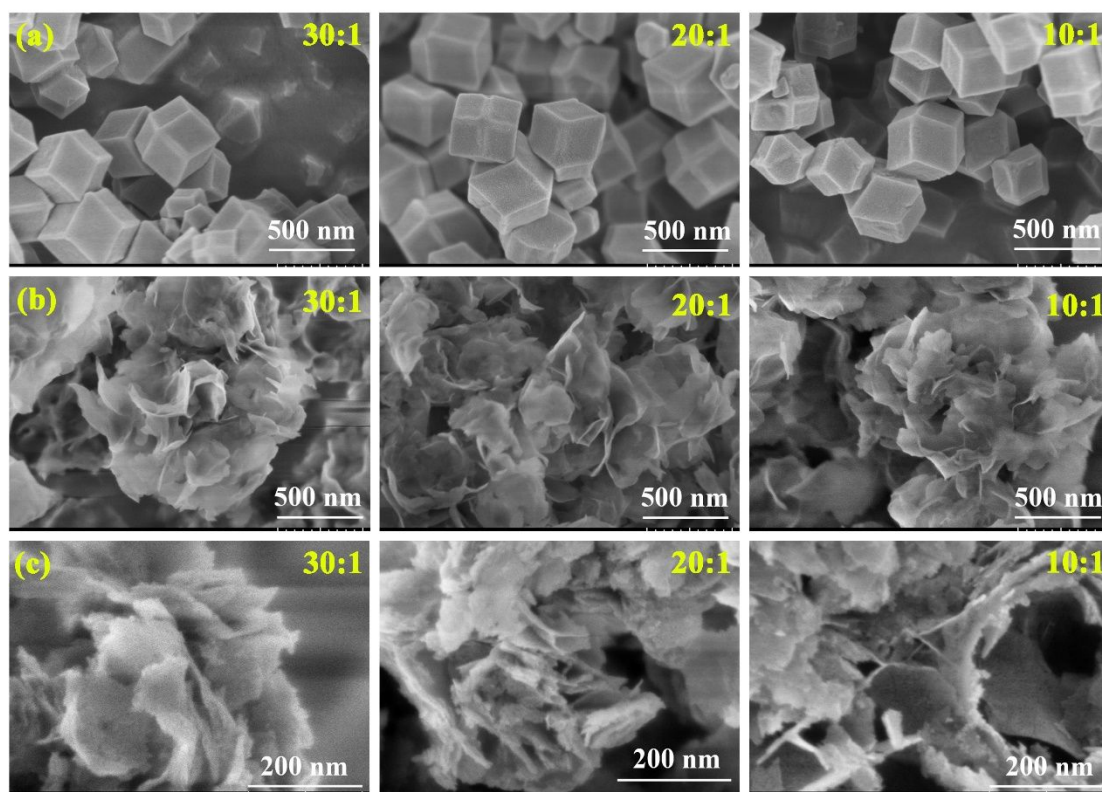

**Figure S7.** SEM images of the (a) ZIF-CoMn, (b) CoMn-MOF NS, and (c) Co-Mn-O NS with different Co/Mn ratios.

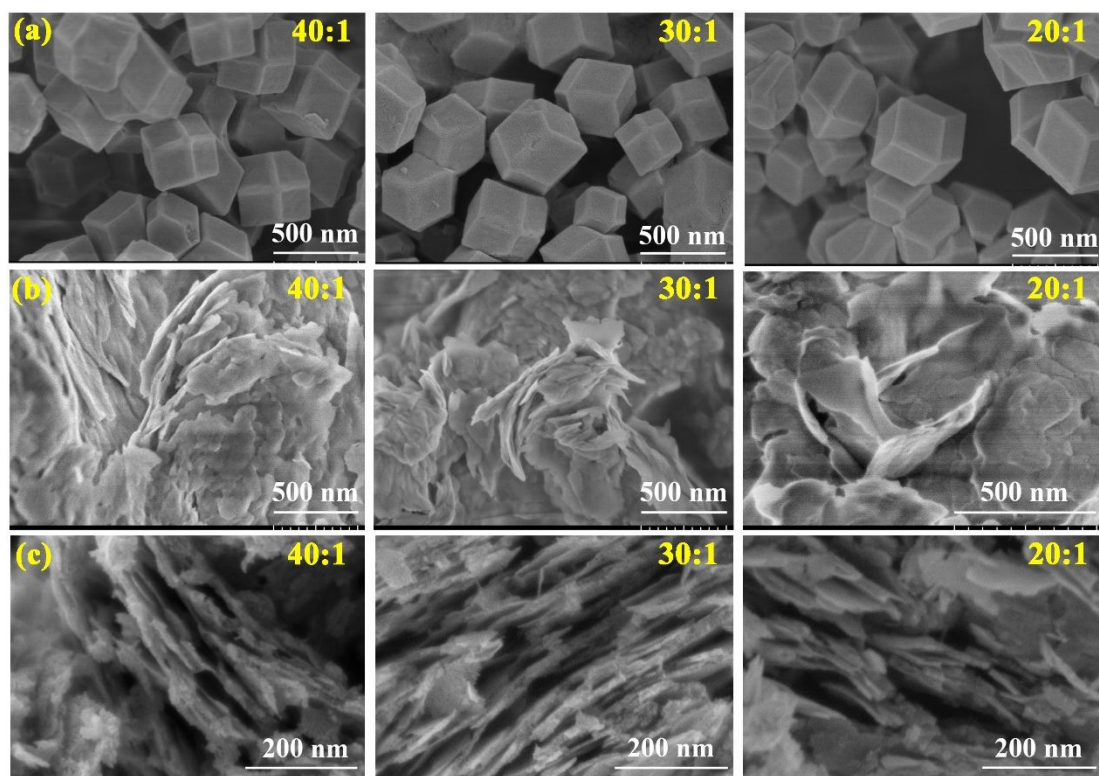

**Figure S8.** SEM images of the (a) ZIF-CoNi, (b) CoNi-MOF NS, and (c) Co-Ni-O NS with different Co/Ni ratios.



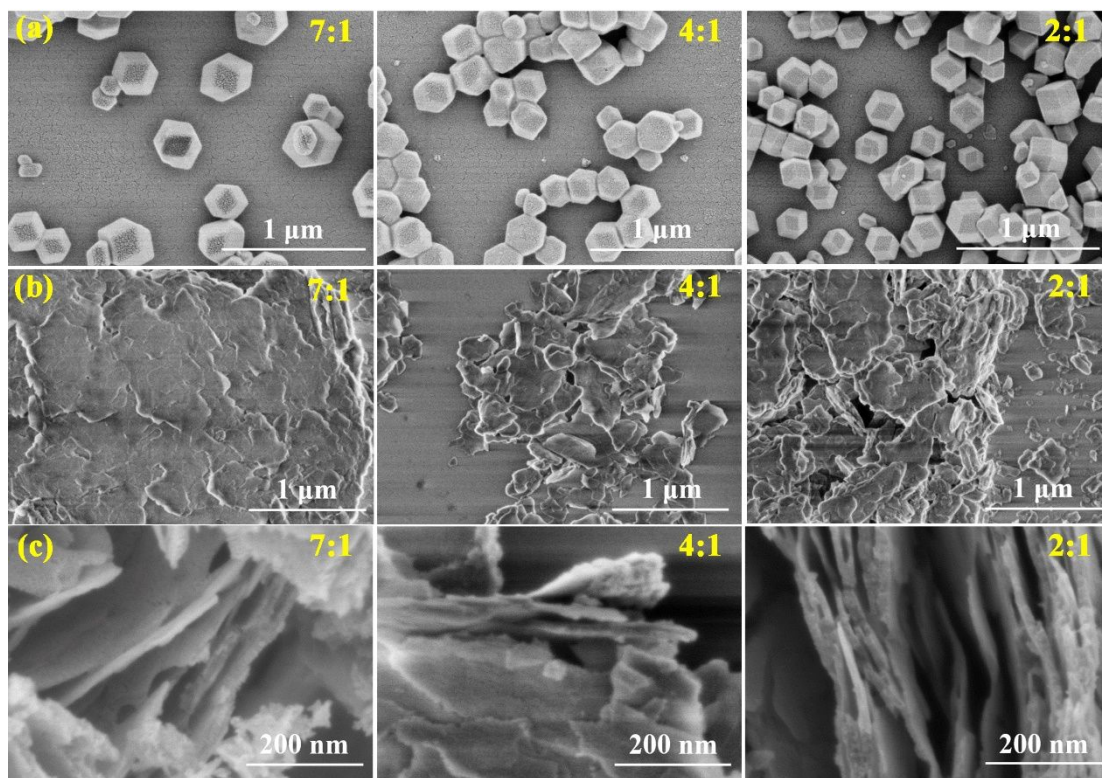

**Figure S9.** SEM images of the (a) ZIF-CoZn, (b) CoZn-MOF NS, and (c) Co-Zn-O NS with different Co/Zn ratios.

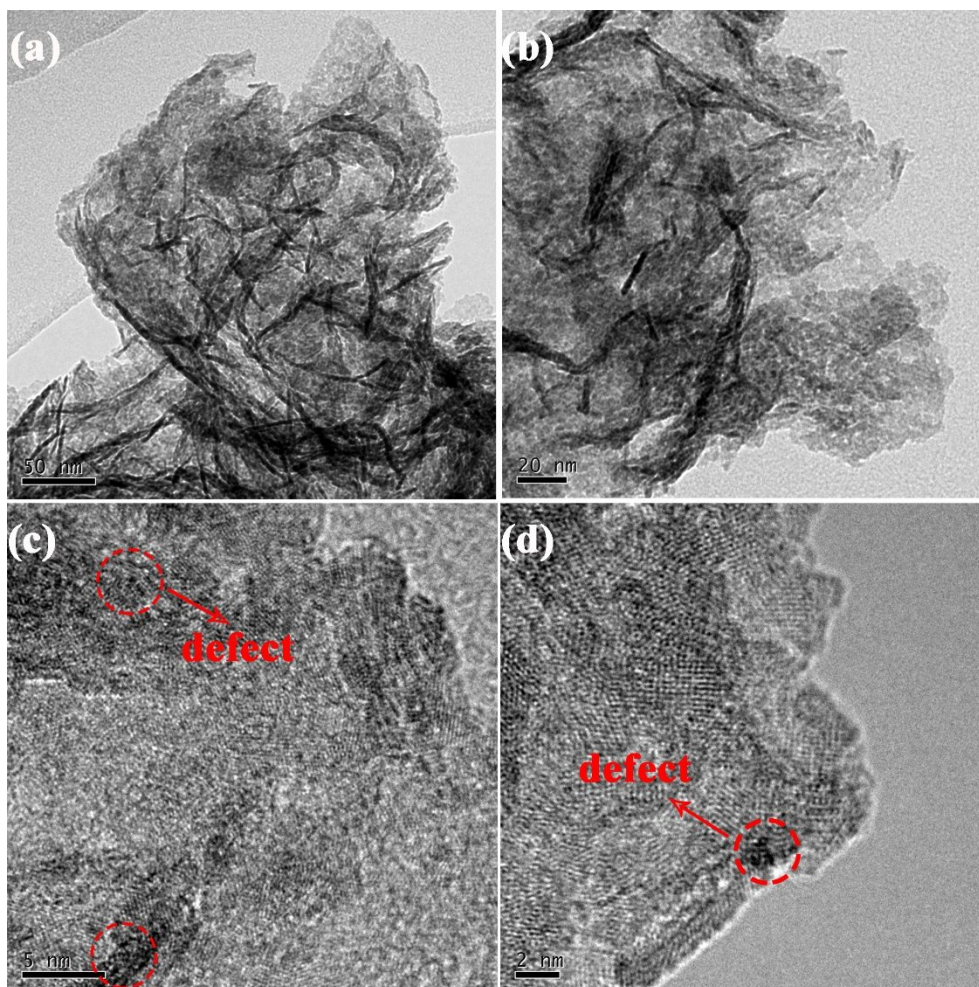

**Figure S10.** TEM images of the Co-Cu-O NS sample.



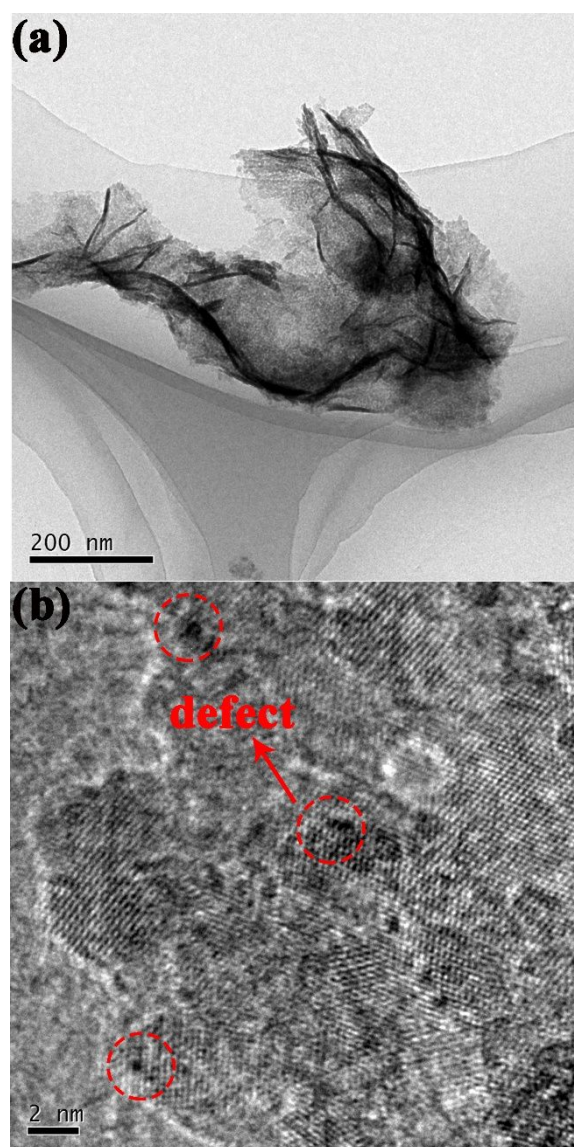

**Figure S11.** TEM images of the Co-Mn-O NS sample.

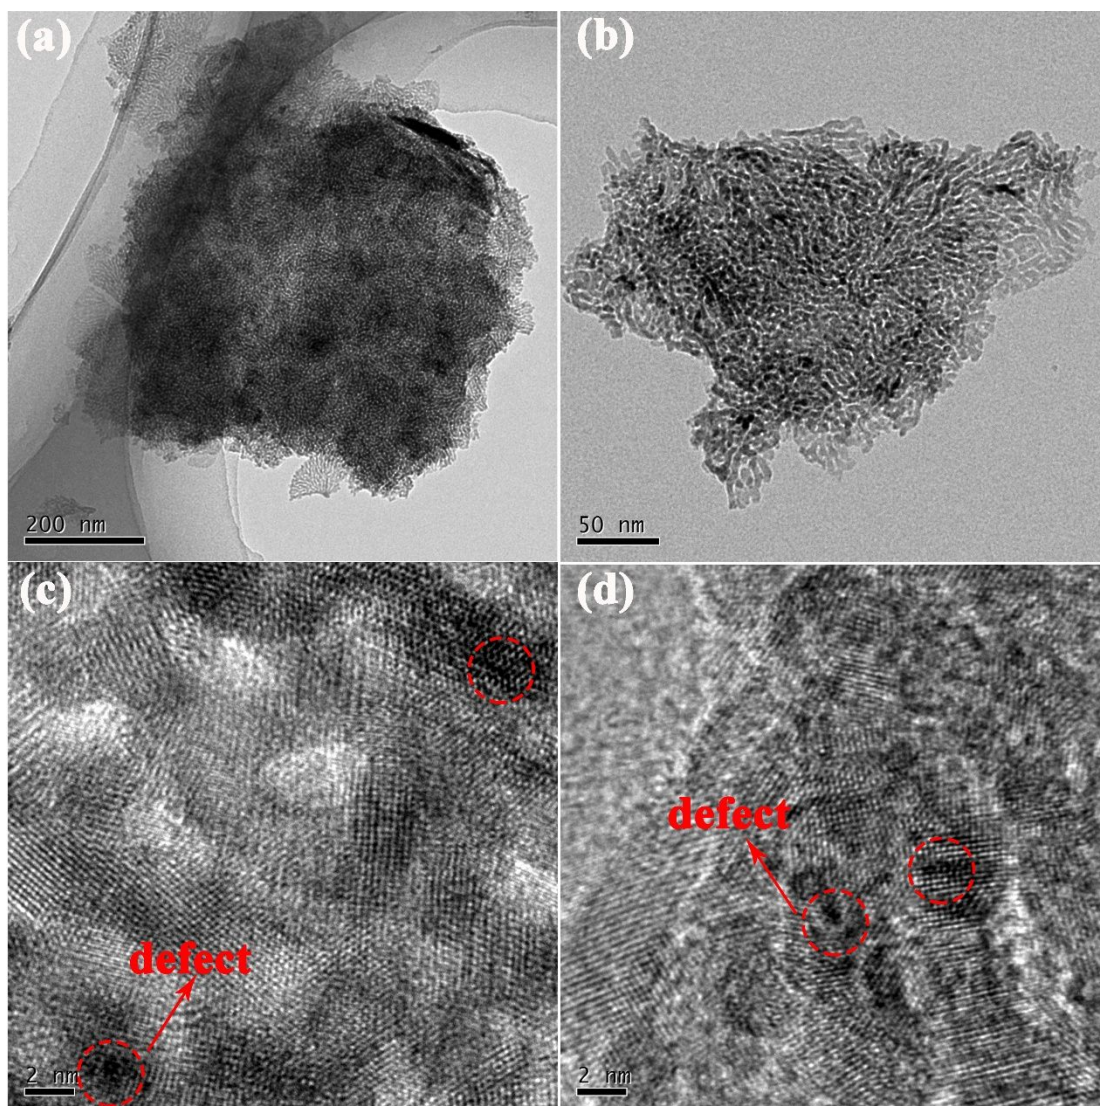

**Figure S12.** TEM images of the Co-Ni-O NS sample.



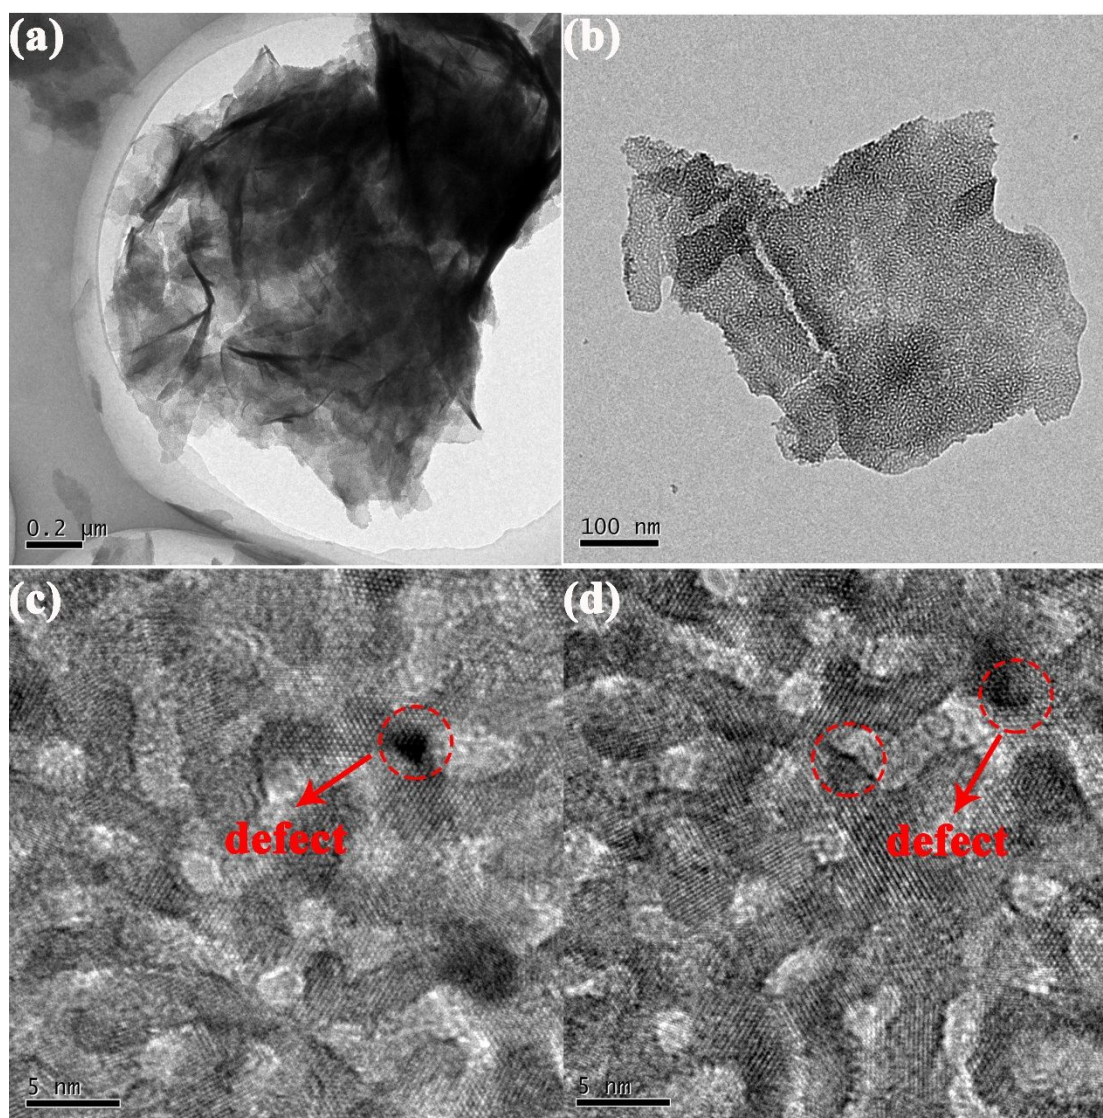

**Figure S13.** TEM images of the Co-Zn-O NS sample.

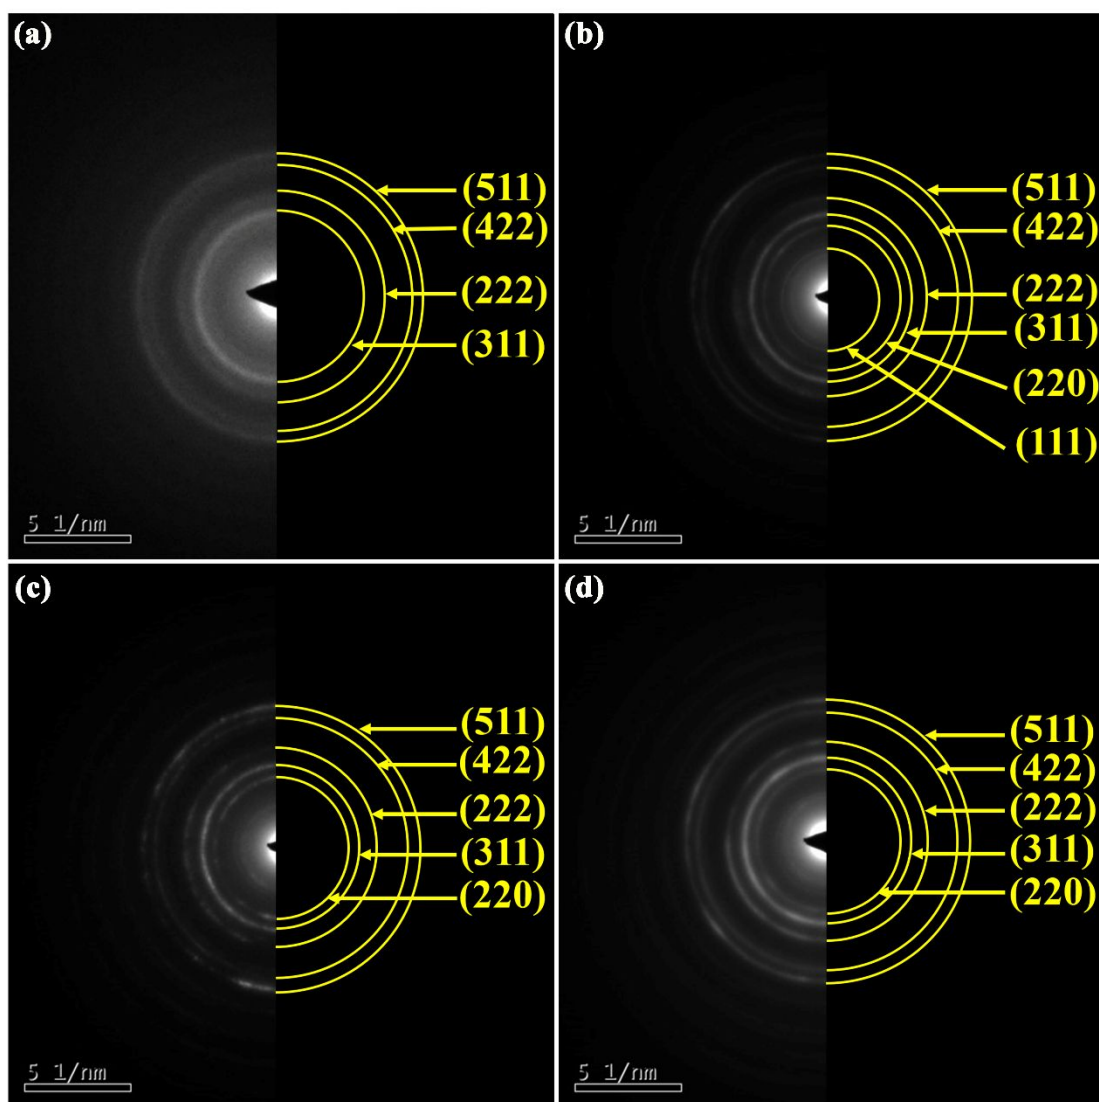

**Figure S14.** SAED patterns of (a) Co-Cu-O NS, (b) Co-Mn-O NS, (c) Co-Ni-O NS, and (d) Co-Zn-O NS samples.

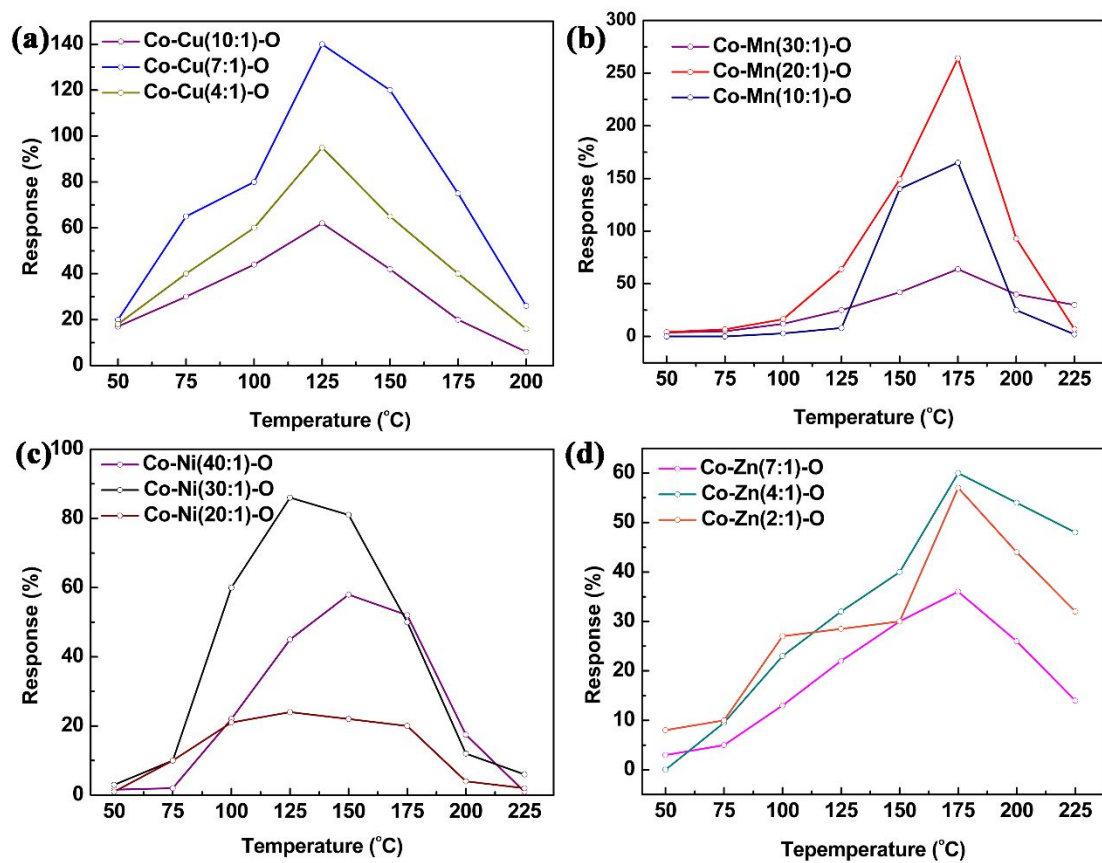

**Figure S15.** Temperature-dependent sensing response of (a) Co-Cu-O NS, (b) Co-Mn-O NS, (c) Co-Ni-O NS, and (d) Co-Zn-O NS toward 100 ppm of CO.

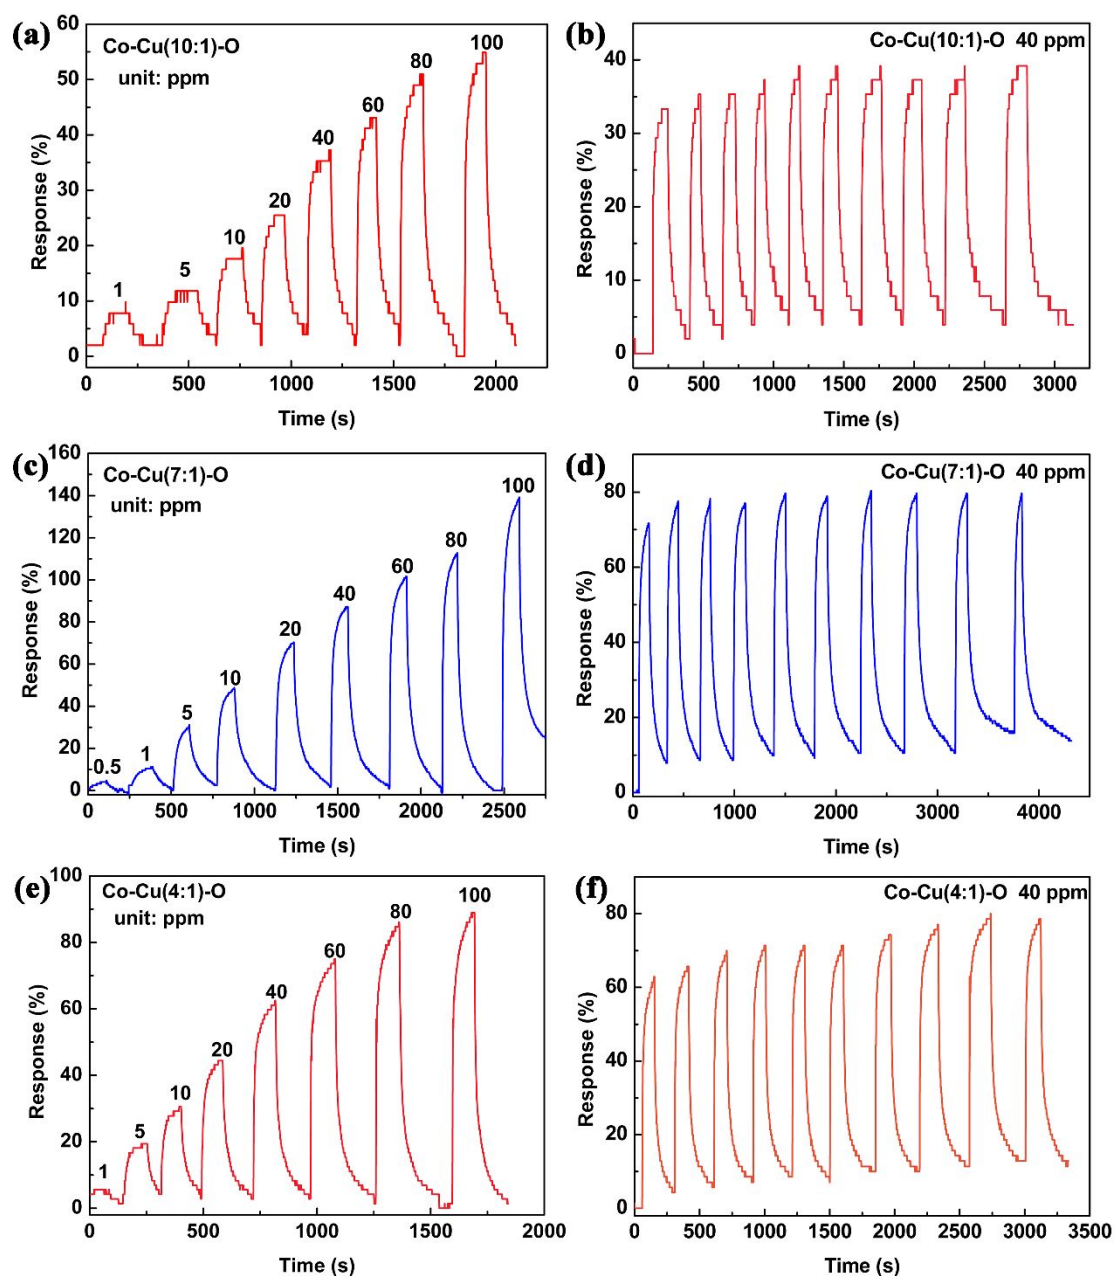

**Figure S16.** Dynamic sensing response of (a) and (b) Co-Cu(10:1)-O NS toward CO, (c) and (d) Co-Cu(7:1)-O NS toward CO, (e) and (f) Co-Cu(4:1)-O NS toward CO at 125 °C.



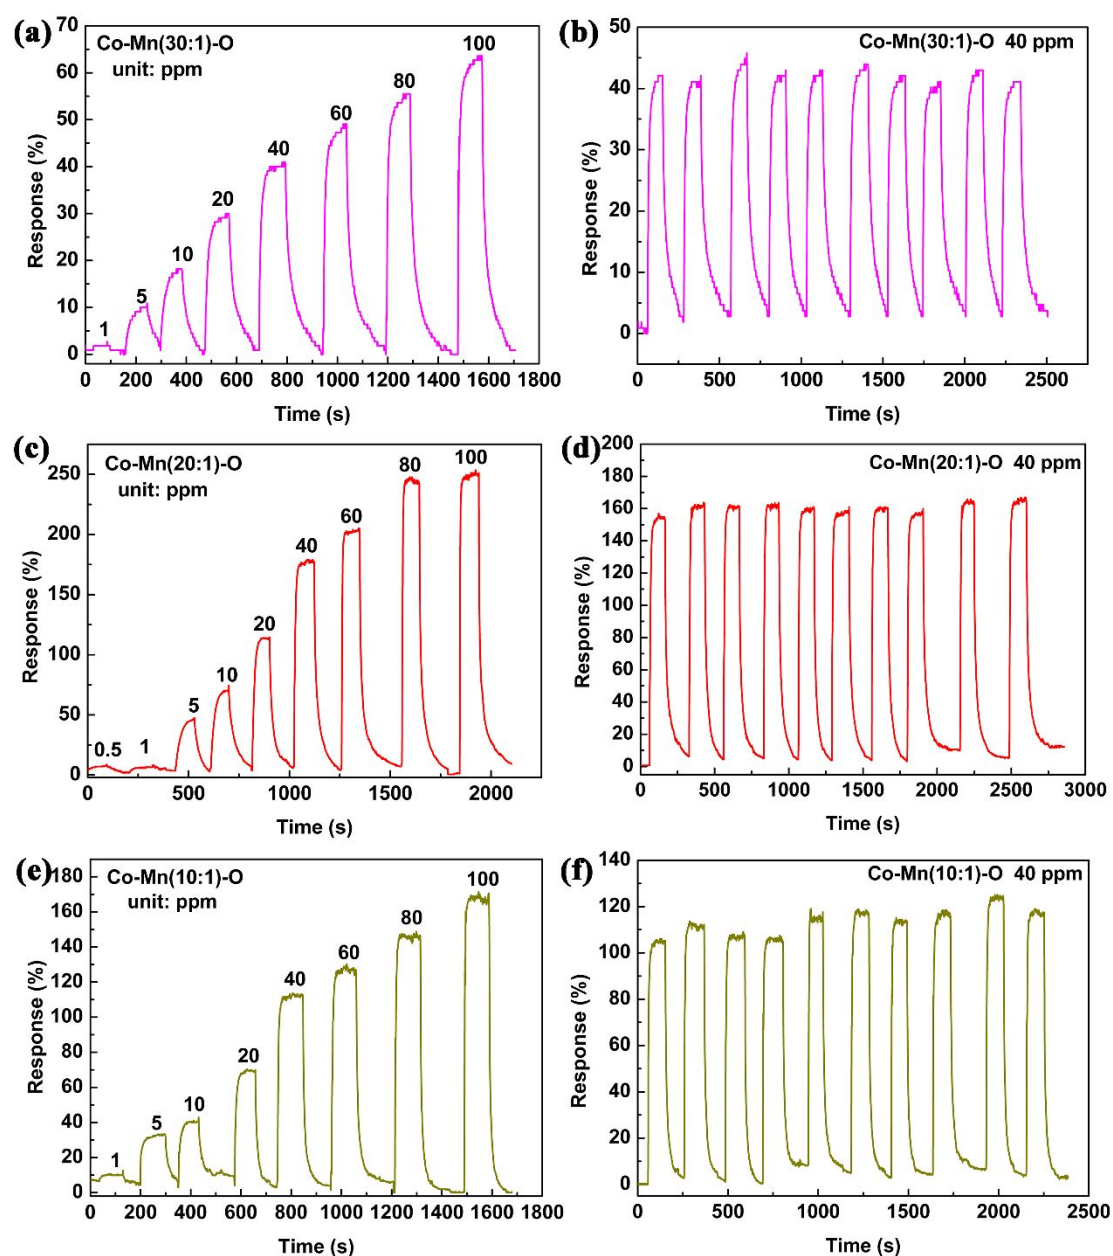

**Figure S17.** Dynamic sensing response of (a) and (b) Co-Mn(30:1)-O NS toward CO, (c) and (d) Co-Mn(20:1)-O NS toward CO, (e) and (f) Co-Mn(10:1)-O NS toward CO at 175 °C.

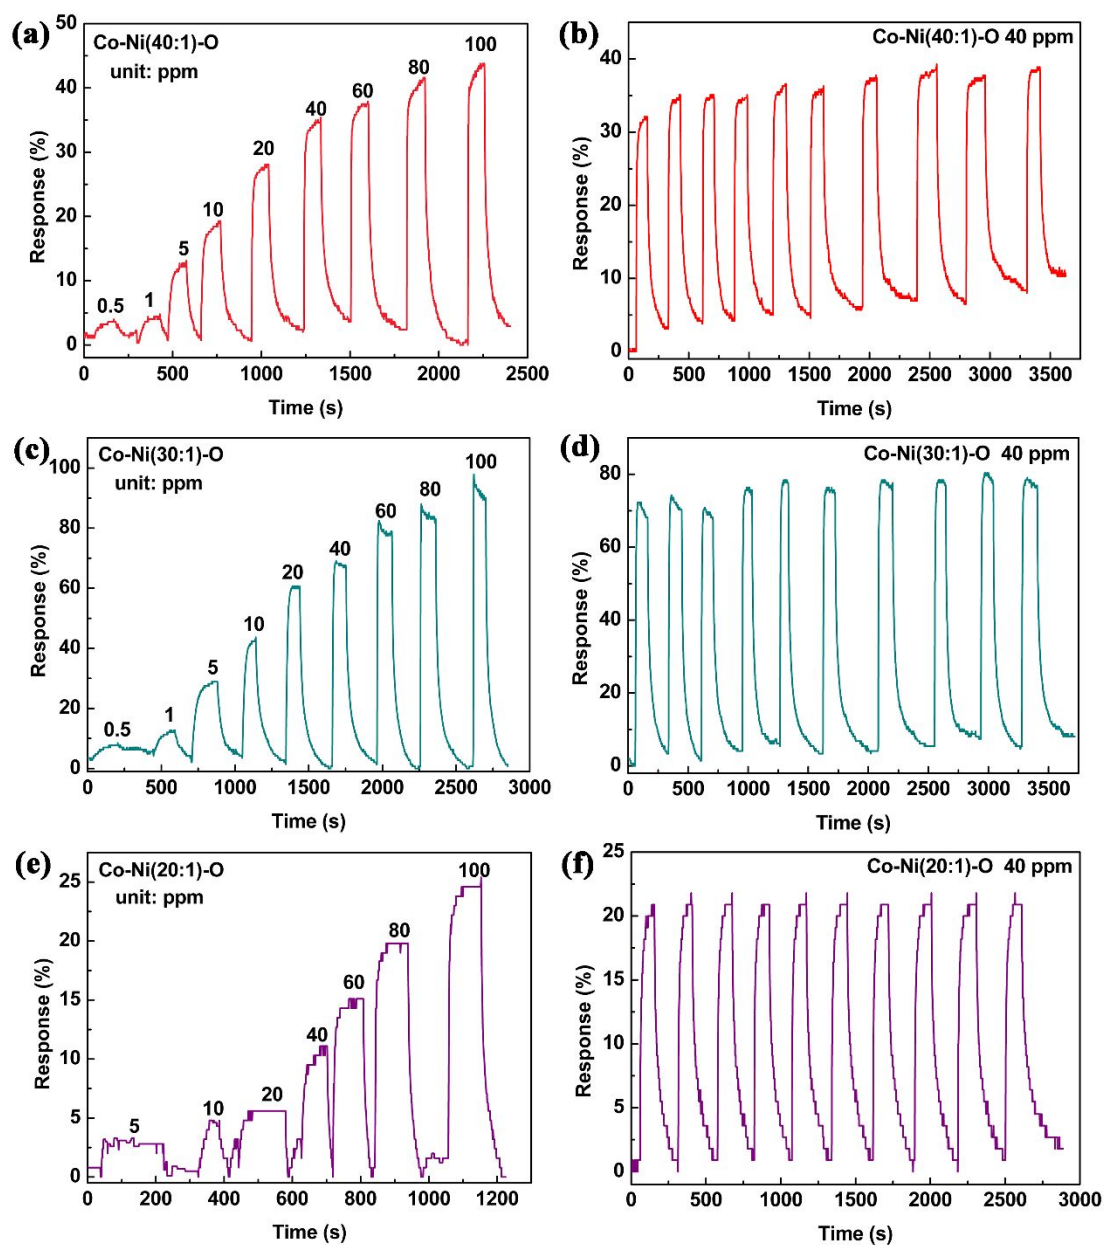

**Figure S18.** Dynamic sensing response of (a) and (b) Co-Ni(40:1)-O NS toward CO, (c) and (d) Co-Ni(30:1)-O NS toward CO, (e) and (f) Co-Ni(20:1)-O NS toward CO at 125 °C.



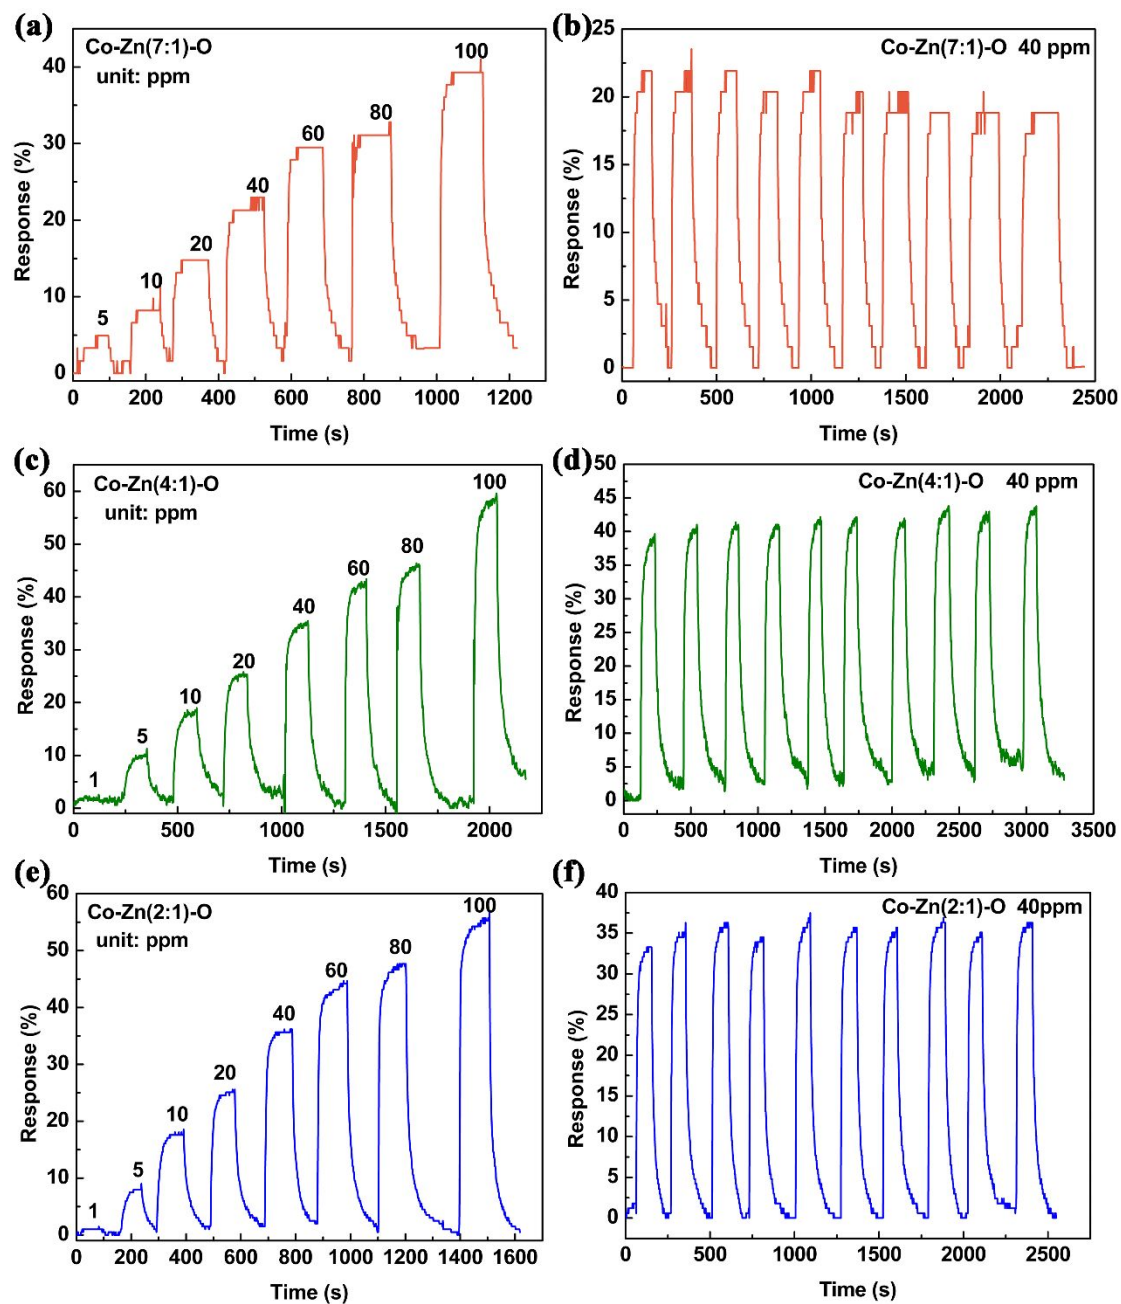

**Figure S19.** Dynamic sensing response of (a) and (b) Co-Zn(7:1)-O NS toward CO, (c) and (d) Co-Zn(4:1)-O NS toward CO, (e) and (f) Co-Zn(2:1)-O NS toward CO at 175 °C.

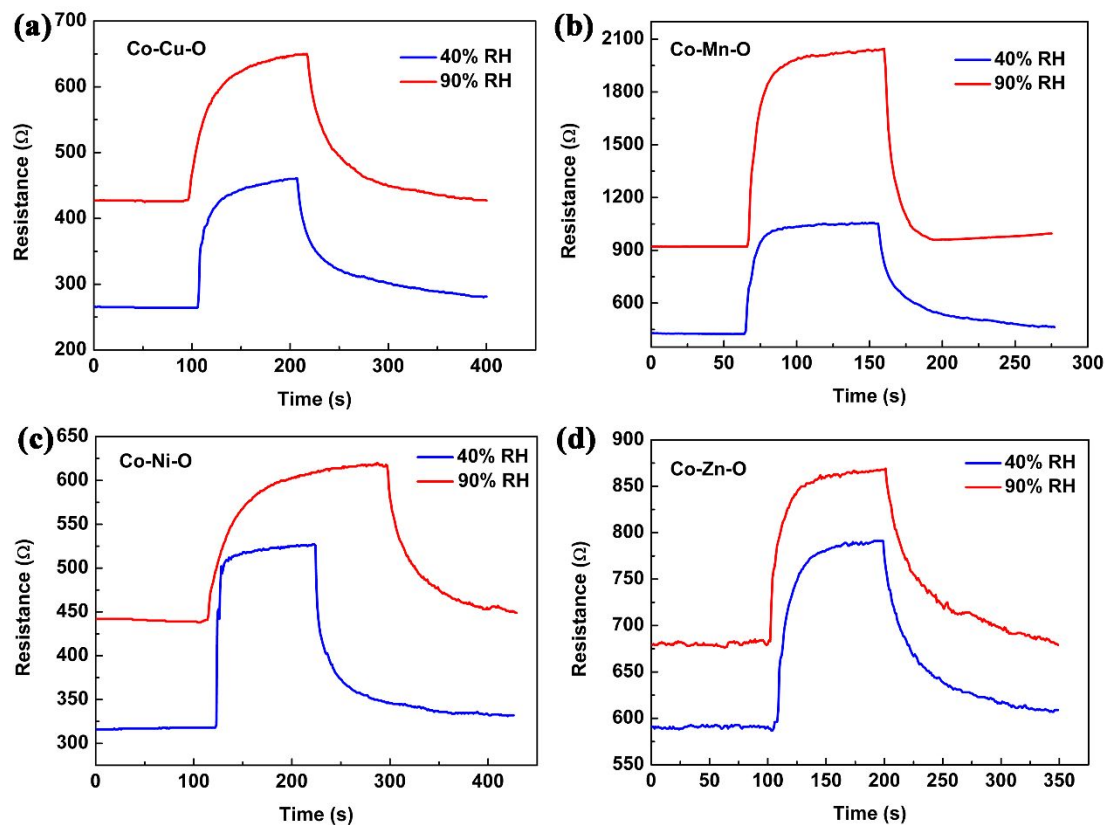

**Figure S20.** Dynamic gas-sensing transients of the (a) Co-Cu-O toward 40 ppm of CO at 125 °C, (b) Co-Mn-O toward 40 ppm of CO at 175 °C, (c) Co-Ni-O toward 40 ppm of CO at 125 °C, and (d) Co-Zn-O toward 40 ppm of CO at 175 °C, respectively, under different humid (40% RH and 90% RH) conditions.

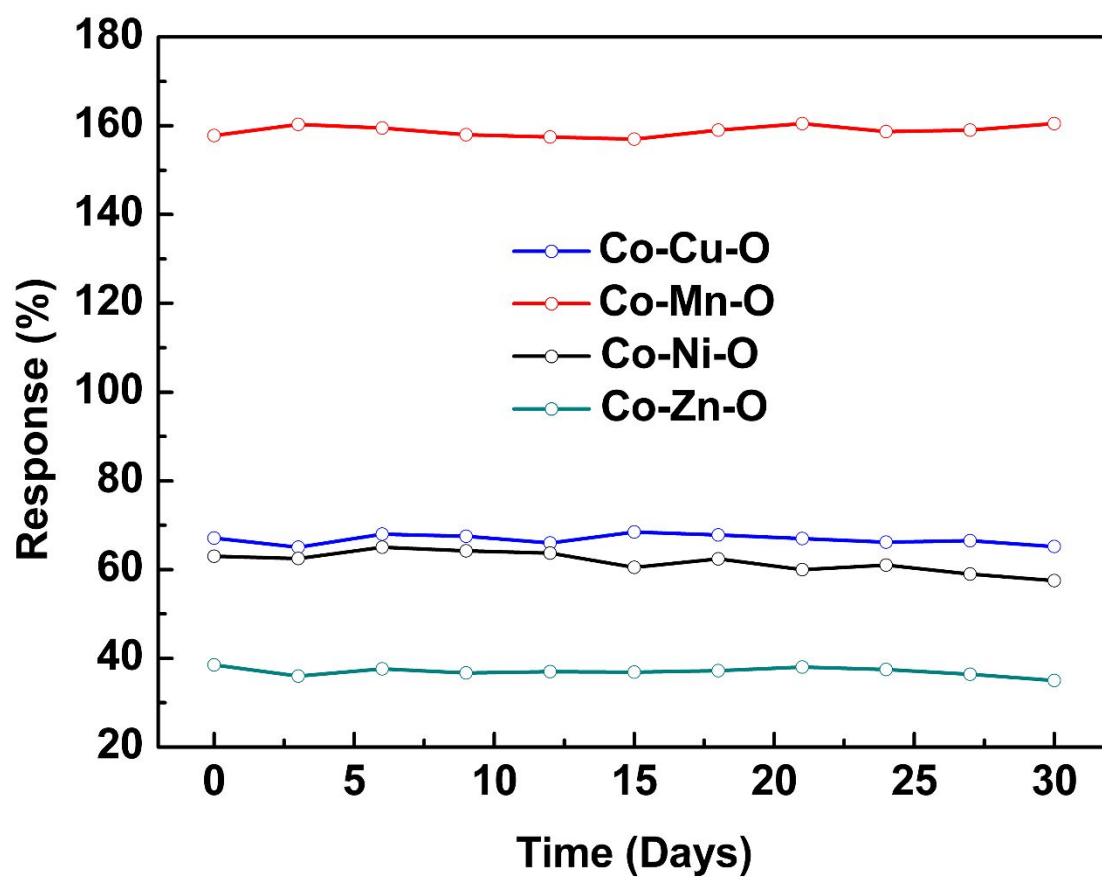

**Figure S21.** Long-term stability of the sensors toward 40 ppm CO of Co-Cu-O and Co-Ni-O at 125 °C, Co-Mn-O and Co-Zn-O at 175 °C.

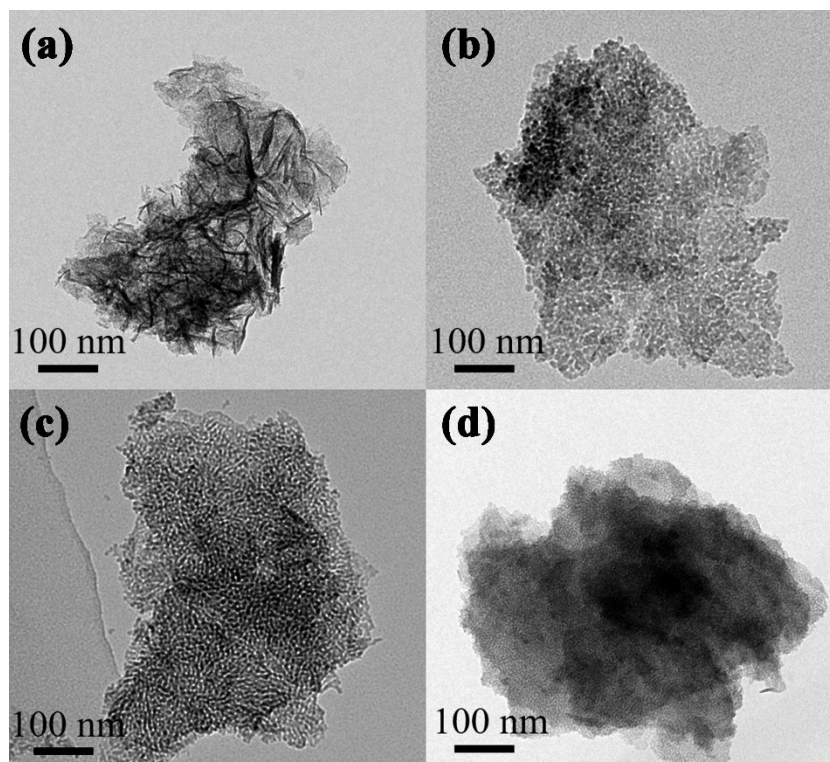

**Figure S22.** TEM images of the Co-M-O NS samples: (a) Co-Cu-O; (b) Co-Mn-O; (c) Co-Ni-O; (d) Co-Zn-O after humidity and stability tests to CO.

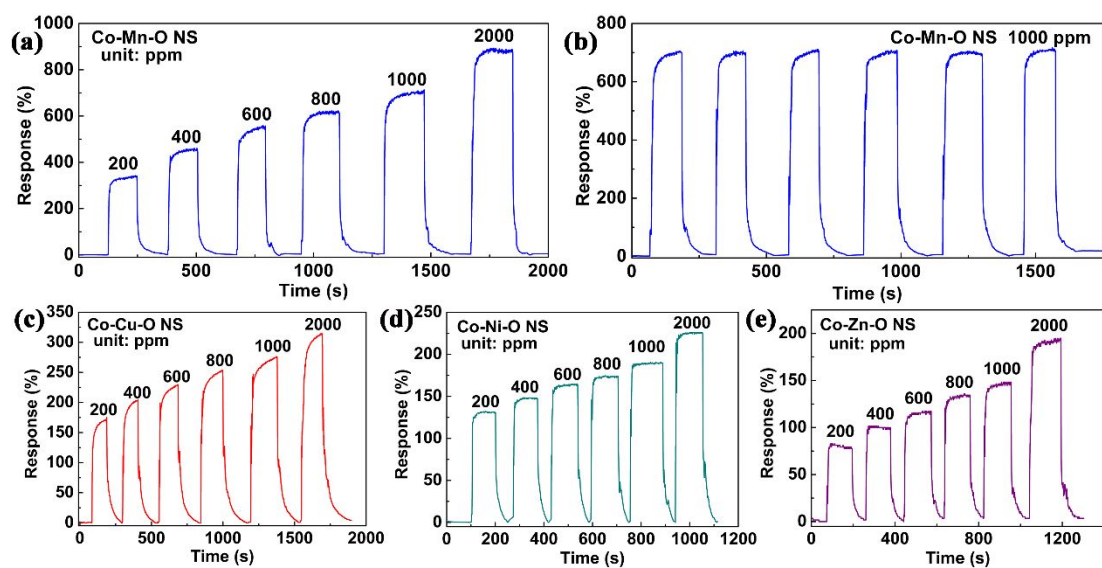

**Figure S23.** Dynamic sensing response of (a) and (b) Co-Mn-O NS at 175 °C, (c) Co-Cu-O NS at 125 °C, (d) Co-Ni-O NS at 125 °C, (e) Co-Zn-O NS at 175 °C.

**Table S2.** Comparison of carbon monoxide sensing performances of Co<sub>3</sub>O<sub>4</sub>-based materials reported in literature and in this work.

| Sensing Materials                                           | Con.<br>(ppm) | Res.               | Tem.<br>(°C) | t <sub>res</sub> /t <sub>rec</sub> (s) | Ref.      |
|-------------------------------------------------------------|---------------|--------------------|--------------|----------------------------------------|-----------|
| Co <sub>3</sub> O <sub>4</sub> nanofibers                   | 40            | 3.6 <sup>a</sup>   | 100          | N/A                                    | (1)       |
| Co <sub>3</sub> O <sub>4</sub> /TiO <sub>2</sub> nanofibers | 80            | 15.5 <sup>a</sup>  | 220          | 0.5 s/1 s                              | (2)       |
| Co <sub>3</sub> O <sub>4</sub> nano-combs                   | 100           | 11.6 <sup>a</sup>  | 180          | 0.5 s/2.3 s                            | (3)       |
| Co <sub>3</sub> O <sub>4</sub> nanospheres                  | 25            | < 2.2 <sup>a</sup> | 200          | N/A                                    | (4)       |
| Co <sub>3</sub> O <sub>4</sub> /Al-ZnO nanoparticles        | 1000          | 0.8% <sup>b</sup>  | 160          | N/A                                    | (5)       |
| Ag/Co <sub>3</sub> O <sub>4</sub> nanoparticles             | 800           | 85% <sup>b</sup>   | 130          | N/A                                    | (6)       |
| PANI/Co <sub>3</sub> O <sub>4</sub> nanoparticles           | 75            | 81% <sup>b</sup>   | RT           | 40 s/N/A                               | (7)       |
| Co <sub>3</sub> O <sub>4</sub> nanorods                     | 50            | 6.55 <sup>a</sup>  | 250          | 4 s/6 s                                | (8)       |
| NiO/Co <sub>3</sub> O <sub>4</sub> nanoparticles            | 300           | 150% <sup>b</sup>  | 150          | N/A                                    | (9)       |
| Co <sub>3</sub> O <sub>4</sub> nanospheres                  | 300           | 1.57 <sup>a</sup>  | 170          | N/A                                    | (10)      |
| Co <sub>3</sub> O <sub>4</sub> nanowires                    | 50            | 12 <sup>a</sup>    | 100          | N/A                                    | (11)      |
| Co-Cu-O NS                                                  | 100           | 140% <sup>b</sup>  | 125          | 21 s/80 s                              | This work |
| Co-Mn-O NS                                                  | 100           | 264% <sup>b</sup>  | 175          | 10 s/53 s                              | This work |
| Co-Ni-O NS                                                  | 100           | 90% <sup>b</sup>   | 125          | 4 s/68 s                               | This work |
| Co-Zn-O NS                                                  | 100           | 60% <sup>b</sup>   | 175          | 27 s/80 s                              | This work |

Note: a:  $(R_g/R_a)$ , b:  $(R_g-R_a)/R_a \times 100\%$ , Con: Concentration, Res: Response, Tem:

Temperature

**Table S3.** Results of curve fitting of Co 2p and O 1s XPS spectra of the Co-M-O samples

| Sensing Materials | Co <sup>3+</sup> /Co <sup>2+</sup> | O <sub>L</sub> (%) | O <sub>V</sub> (%) | O <sub>C</sub> (%) |
|-------------------|------------------------------------|--------------------|--------------------|--------------------|
| Co-Cu-O NS        | 2.35                               | 44.5               | 25.9               | 29.6               |
| Co-Mn-O NS        | 2.60                               | 42.3               | 22.6               | 35.1               |
| Co-Ni-O NS        | 2.21                               | 45.1               | 27.9               | 27.0               |
| Co-Zn-O NS        | 1.30                               | 60.1               | 15.2               | 24.7               |

## References

- (1) Busacca, C.; Donato, A.; Faro, M. L.; Malara, A.; Neri, G.; Trocino, S. CO gas sensing performance of electrospun  $\text{Co}_3\text{O}_4$  nanostructures at low operating temperature. *Sens. Actuators B: Chem.* 2020, 303, 127193.
- (2) Wang, L. L.; Deng, J. N.; Lou, Z.; Zhang, T. Cross-linked p-type  $\text{Co}_3\text{O}_4$  octahedral nanoparticles in 1D n-type  $\text{TiO}_2$  nanofibers for high-performance sensing devices. *J. Mater. Chem. A* 2014, 2, 10022-10028.
- (3) Deng, J. N.; Wang, L. L.; Lou, Z.; Zhang, T. Fast response/recovery performance of comb-like  $\text{Co}_3\text{O}_4$  nanostructure. *RSC Adv.* 2014, 4, 21115-21120.
- (4) Vetter, S.; Haffer, S.; Wagner, T.; Tiemann, M. Nanostructured  $\text{Co}_3\text{O}_4$  as a CO gas sensor: Temperature-dependent behavior. *Sens. Actuators B: Chem.* 2015, 206, 133-138.
- (5) Fort, A.; Panzardi, E.; Vegnoli, V.; Hjiri, M.; Aida, M. S.; Mugnaini, M.; Addabbo, T.  $\text{Co}_3\text{O}_4/\text{Al-ZnO}$  Nano-composites: Gas Sensing Properties. *Sens.* 2019, 19, 760.
- (6) Molavi, R.; Sheikhi, M. H.; Low temperature carbon monoxide gas sensor based on  $\text{Ag-Co}_3\text{O}_4$  thick film nanocomposite. *Mater. Lett.* 2018, 233, 74-77.
- (7) Sen, T.; Shimpi, N. G.; Mishra, S. Room temperature CO sensing by polyaniline/ $\text{Co}_3\text{O}_4$  nanocomposite. *J. Appl. Polym. Sci.* 2016, 133, 44115.
- (8) Patil, D.; Patil, P.; Subramanian, V.; Joy, P. A.; Potdar, H. S. Highly sensitive and fast responding CO sensor based on  $\text{Co}_3\text{O}_4$  nanorods. *Talanta* 2010, 81, 37-43.
- (9) Chen, K. W.; Tsai, J. H.; Chen, C. H. NiO functionalized  $\text{Co}_3\text{O}_4$  hetero-nanocomposites with a novel apple-like architecture for CO gas sensing applications. *Mater. Lett.* 2019, 255, 126508.



- (10) Chen, K. W.; Tsai, J. H.; Chen, C. H. Controlled synthesis and CO sensing potentials of size-tunable highly-uniform mesoporous  $\text{Co}_3\text{O}_4$  nanospheres. *J. Alloys Compd.* 2020, 816, 152524.
- (11) Dou, Z. F.; Cao, C. Y.; Chen, Y.; Song, W. G. Fabrication of porous  $\text{Co}_3\text{O}_4$  nanowires with high CO sensing performance at a low operating temperature. *Chem. Commun.* 2014, 50, 14889-14891.
